# Supplementary material for: Cryogenic abnormal thermal expansion properties of carbon-doped La(Fe,Si)13 compounds
Source: Royal Society of Chemistry journal article supplement (doi:10.1039/c5cp03948g), 2015-01-01
Supplement: c5cp03948g1.pdf [file c5cp03948g1.pdf]

Supporting information

**Cryogenic abnormal thermal expansion property of carbon-doped  
La(Fe,Si)<sub>13</sub> compounds**

Shaopeng Li,<sup>ab</sup> Rongjin Huang,<sup>\*a</sup> Yuqiang Zhao,<sup>ab</sup> Wei Wang<sup>a</sup> and Laifeng Li<sup>\*a</sup>

<sup>a</sup> Key Laboratory of Cryogenics, Technical Institute of Physics and Chemistry, Chinese Academy of Sciences, Beijing, P.R. China

<sup>b</sup> University of Chinese Academy of Sciences, Beijing, P.R. China

E-mail: huangrongjin@mail.ipc.ac.cn; laifengli@mail.ipc.ac.cn;

The variable-temperature X-ray diffraction spectra for samples of  $\text{LaFe}_{11.5}\text{Si}_{1.5}\text{C}_x$  ( $x=0, 0.2, 0.4$  and  $0.6$ )

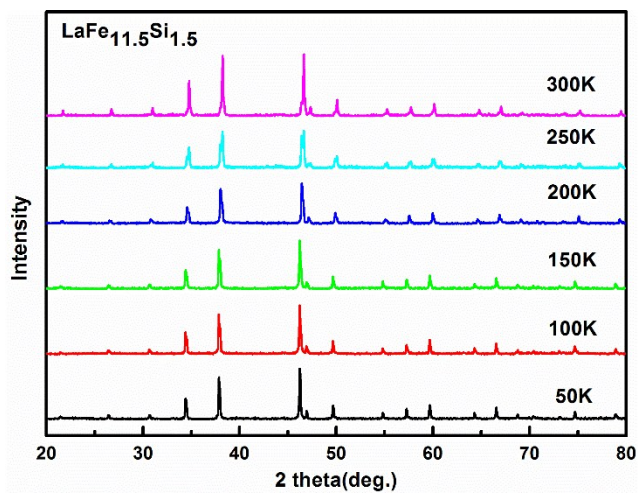

Fig. S1 The variable-temperature X-ray diffraction patterns from 50 to 300 K for sample of  $\text{LaFe}_{11.5}\text{Si}_{1.5}$ .

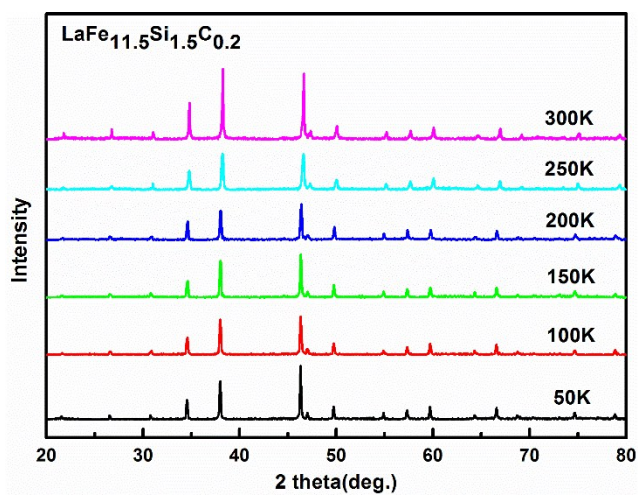

Fig. S2 The variable-temperature X-ray diffraction patterns from 50 to 300 K for sample of  $\text{LaFe}_{11.5}\text{Si}_{1.5}\text{C}_{0.2}$ .

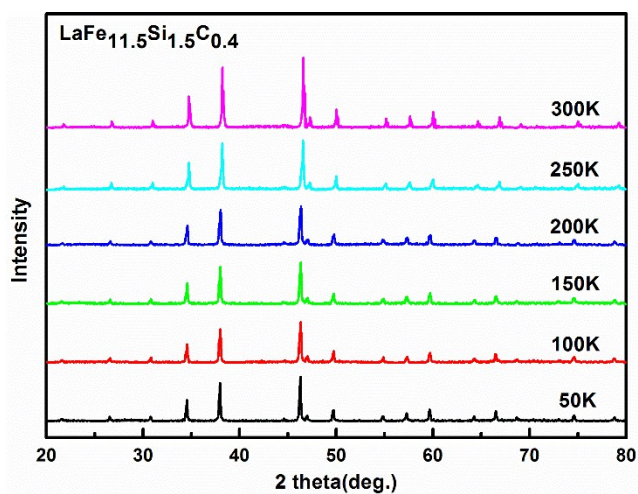

Fig. S3 The variable-temperature X-ray diffraction patterns from 50 to 300 K for sample of  $\text{LaFe}_{11.5}\text{Si}_{1.5}\text{C}_{0.4}$ .

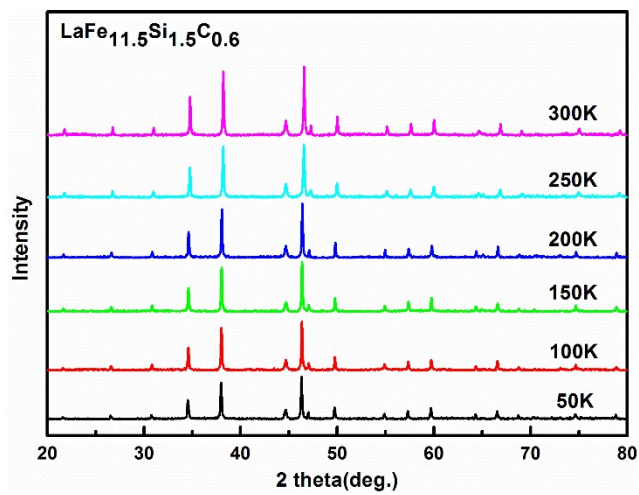

Fig. S4 The variable-temperature X-ray diffraction patterns from 50 to 300 K for sample of  $\text{LaFe}_{11.5}\text{Si}_{1.5}\text{C}_{0.6}$ .
